# Supplementary material for: Quantification of the Iodine Content of Perigastric Adipose Tissue by Dual-Energy CT: A Novel Method for Preoperative Diagnosis of T4-Stage Gastric Cancer
Source: PubMed Central journal article supplement (PMC4570799; doi:10.1371/journal.pone.0136871), 2015-09-15

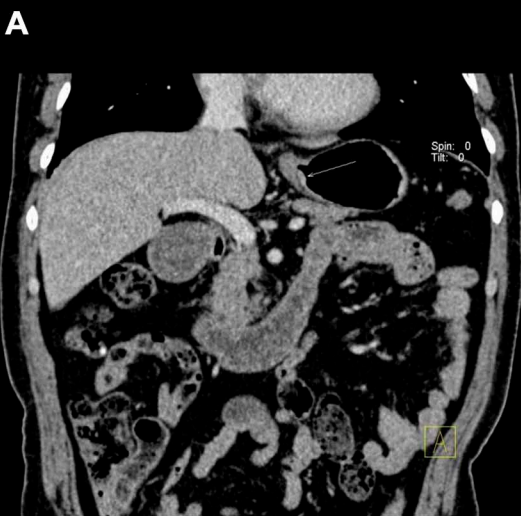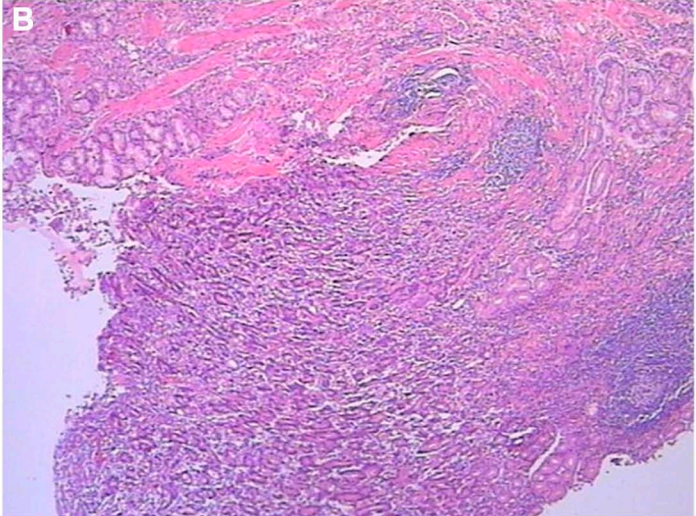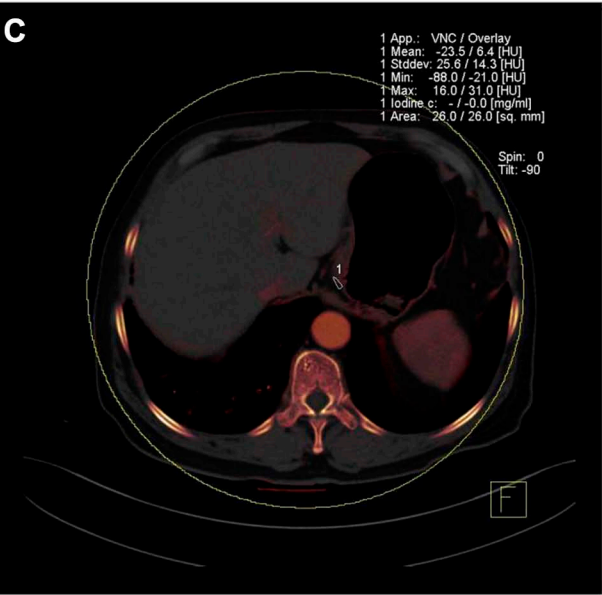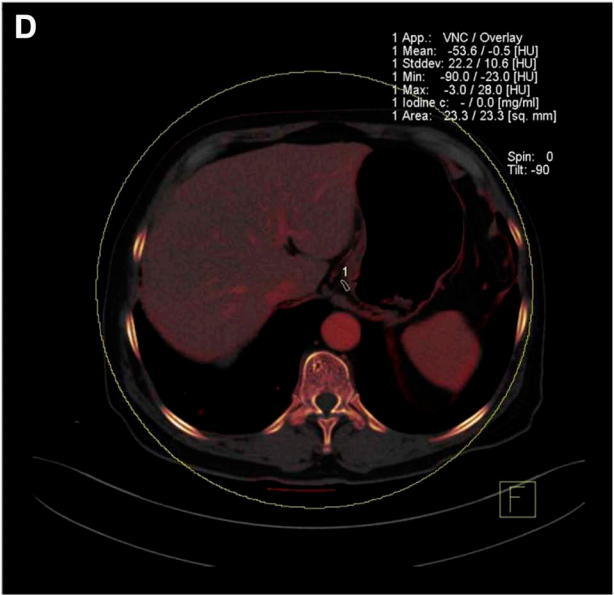

Supplement: pone.0136871.s002.pdf [file pone.0136871.s002.pdf]
